# Supplementary material for: Modulation of Primary Cilia by Alvocidib Inhibition of CILK1
Source: MDPI journal article supplement (doi:10.3390/ijms23158121), 2022-07-23
Supplement: s1 [file s1]

# Supplementary material

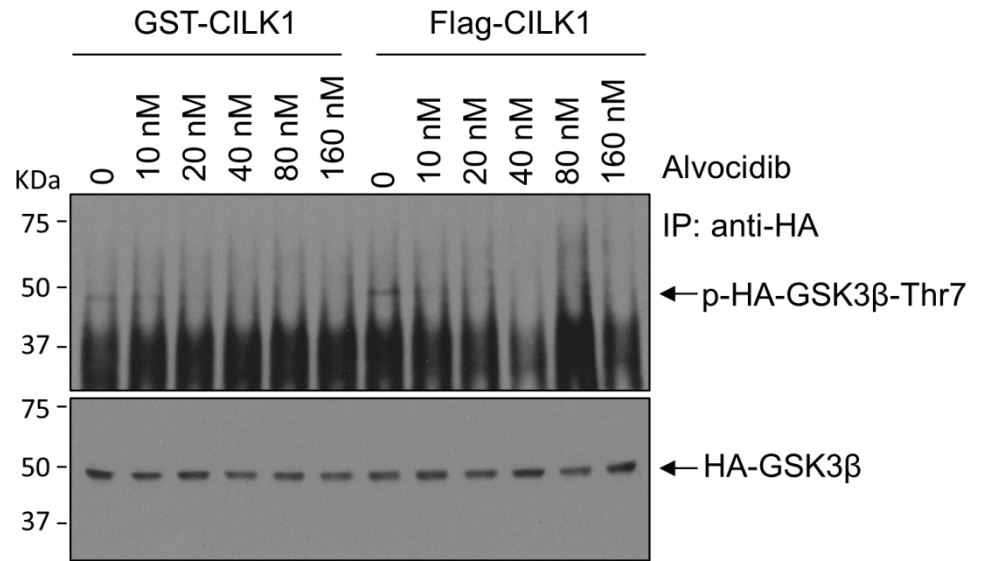

**Figure S1.** Alvocidib effect on CILK1 phosphorylation of GSK3 $\beta$  in cells. GST-CILK1 or Flag-CILK1 was co-transfected with HA-GSK3 $\beta$  (substrate) into HEK293T cells. Forty-eight hours after transfection, cells were treated with increasing concentrations of Alvocidib in DMSO for 15 mins before lysis. HA-GSK3 $\beta$  was immunoprecipitated from cell extracts with mouse monoclonal HA-tag antibody (12CA5) and Western blotted for total and phospho-T7 HA-GSK3 $\beta$  signals. .
